# Supplementary material for: Prevalence of IRF4 rearrangement in large B-cell lymphomas of the Waldeyer’s ring in adults
Source: PubMed Central journal article supplement (PMC10033557; doi:10.1007/s00428-023-03516-7), 2023-02-22
Supplement: 428_2023_3516_MOESM1_ESM.pdf [file 428_2023_3516_MOESM1_ESM.pdf]

Supplemental Material

Prevalence of *IRF4*  
Rearrangement in Large B-  
Cell Lymphomas of the  
Waldeyer's Ring in Adults

Sebastian Streich, Leonie Frauenfeld, Franziska Otto, Barbara Mankel,  
Irina Bonzheim, Falko Fend, Leticia Quintanilla-Martinez

# Contents

- Supplemental methods..... 3
  - Gene expression profiling (GEP) ..... 3
  - Mutational analysis – targeted Next Generation Sequencing ..... 3
- Supplemental tables..... 5
- Supplemental figures.....16
- Supplemental references.....17

# 1 Supplemental methods

## 2 Gene expression profiling (GEP)

3 Next generation sequencing (NGS-)based gene expression profiling (GEP) was performed to  
4 classify the DLBCL samples into GCB, ABC or unclassifiable subtypes using the HTG  
5 EdgeSeq System (HTG Molecular Diagnostics Inc., Tucson, AZ, USA). HTG gene expression  
6 data was generated using the HTG EdgeSeq DLBCL Cell of Origin Assay IT for Ion Torrent  
7 platform (Ion GeneStudio S5 prime, Thermo Fisher Scientific, Waltham, MA, USA). Starting  
8 material was tissue sections using 5 µm formalin-fixed paraffin embedded (FFPE) sections  
9 according to the manufactures protocol. Target capture, final libraries and semiconductor  
10 sequencing were performed with KAPA Library Quantification Kit, the Ion 510 & Ion 520 & Ion  
11 530 Kit – Chef and the Ion 520 Chip Kit (Thermo Fisher Scientific, Waltham, MA, USA)  
12 according to the HTG recommendations, prepared for sequencing for Ion Torrent platform (F.  
13 Hoffman - La Roche AG, Basel/Kaiseraugst, Schweiz). The HTG EdgeSeq DLBCL panel  
14 measures the expression of 92 genes associated to B-cell lymphomas. The COO classification  
15 was performed using the HTG Edge System software (Version 5.5.823.5747). The HTG  
16 algorithm is trained to minimise the unclassifiable subgroup when compared with other  
17 methods. [1]

## 18 Mutational analysis – targeted Next Generation Sequencing

19 Targeted mutation analysis was performed by Next Generation Sequencing (Ion GeneStudio  
20 S5 prime, Thermo Fisher Scientific) using an AmpliSeq Custom Panel designed for DLBCLs  
21 (supplemental Table 1). Amplicon library preparation and semiconductor sequencing was done  
22 according to the manufacturers' manuals using the Ion AmpliSeq Library Kit v2.0, the Ion  
23 Library TaqMan Quantitation Kit, the Ion 510 & Ion 520 & Ion 530 Kit – Chef, the Ion 520 Chip  
24 Kit and the Ion 530 Chip Kit (Thermo Fisher Scientific) as described before [2, 3].

25 DNA extracted from FFPE material (Maxwell® RSC DNA FFPE Kit and the Maxwell® RSC  
26 Instrument (Promega, Madison, WI, USA)) was quantified using the Invitrogen Qubit 3  
27 fluorometer (Thermo Fisher Scientific), according to the manufacturer's protocol. For each  
28 sample, two PCR reactions were prepared, using 10 ng of DNA, AmpliSeq HiFi Mix Plus  
29 (Thermo Fisher Scientific) and one of the two panel-specific primer pools, containing 95 or 98  
30 amplicons. The PCR run was set up according to the manufacturer's protocol: initial  
31 denaturation at 99 °C for 2 minutes, followed by 24 cycles of 99 °C for 15 seconds and 60 °C  
32 for 4 minutes. After completing the PCR reaction, an enzymatic partial digestion of the PCR  
33 primer was performed using FuPa exonuclease (Thermo Fisher Scientific), followed by an  
34 enzymatic ligation of Ion Xpress Barcode Adapters (Thermo Fisher Scientific). The prepared  
35 libraries were cleaned up using the HighPrep PCR clean-up system (MagBio Genomics Inc.,

36 Gaithersburg, MD, USA) and quantified using the Ion Library TaqMan Quantitation Kit (Thermo  
37 Fisher Scientific) on a LightCycler 480 qPCR instrument (Roche Molecular Systems). Libraries  
38 were pooled and processed to clonal library amplification and enrichment on Ion Sphere  
39 particles using the Ion Chef platform (Thermo Fisher Scientific). Sequencing was performed  
40 on a 520 or 530 chip on the Ion GeneStudio S5 prime (Thermo Fisher Scientific). The data  
41 analysis was performed on the Ion Torrent Software and the Ion Reporter Software (both  
42 Thermo Fisher Scientific). The threshold for mutations was set to an allele frequency (VAF) of  
43 5% (6% and 7% in one case each due to the limited integrity of the DNA in these cases).  
44 Variant calling of non-synonymous somatic variants compared to the human reference  
45 sequence hg19 was performed using Ion Reporter Software (Thermo Fisher Scientific, Version  
46 5.10.1 to Version 5.16.0.2). Variants called by the Ion Reporter Software were visualized using  
47 the Integrative Genomics Viewer (IGV; Broad Institute, Cambridge, MA; Version 2.8.0) to  
48 exclude panel-specific artefacts. All mutations were verified using the Catalogue of Somatic  
49 Mutations in Cancer (COSMIC; Wellcome Sanger Institute, Cambridgeshire, UK), and the  
50 reference SNP (rs) report (U.S. National Library of Medicine). Precision scores were created  
51 using COSMIC FATHMM, Varsome and CADD.

52 Not entirely clear assessable variants were validated using the Ion Amplicon Library  
53 Preparation Fusion Method (Thermo Fisher Scientific) according to the manufacturers  
54 protocol. Primers were designed using the primer3 software (supplemental Table 2).

## 55 Supplemental tables

## 56 Supplemental table 1. AmpliSeq Custom Panel for the analysis of DLBCL.

| Gene           | Transcript   | Position (GRCh37/hg19)              | Exon(s) | Amplicons* | Coverage of CDS (%) |
|----------------|--------------|-------------------------------------|---------|------------|---------------------|
| <b>EZH2</b>    | NM_004456    | chr7:148,508,712 - chr7:148,508,789 | 16      | 1          | -                   |
| <b>CD79B</b>   | NM_001039933 | chr17:62,006,789 - chr17:62,006,840 | 5       | 1          | -                   |
|                |              | chr17:62,006,586 - chr17:62,006,654 | 6       | 1          | -                   |
| <b>MYD88</b>   | NM_002468    | chr3:38,181,874 - chr3:38,182,064   | 3       | 4          | -                   |
|                |              | chr3:38,182,243 - chr3:38,182,344   | 4       | 2          | -                   |
|                |              | chr3:38,182,618 - chr3:38,182,726   | 5       | 2          | -                   |
| <b>CARD11</b>  | NM_032415    | chr7:2,946,272 - chr7:2,998,140     | CDS     | 54         | 95,30               |
| <b>IRF4</b>    | NM_002460    | chr6:393,153 - chr6:407,598         | CDS     | 18         | 95,61               |
| <b>BCL2</b>    | NM_000633    | chr18:60,795,858 - chr18:60,985,899 | CDS     | 9          | 95,86               |
| <b>TNFAIP3</b> | NM_006290    | chr6:138,192,365 - chr6:138,202,456 | CDS     | 29         | 96,49               |
| <b>PRDM1</b>   | NM_001198    | chr6:106,534,429 - chr6:106,555,361 | CDS     | 29         | 91,66               |
| <b>BCL6</b>    | NM_001706    | chr3:187,440,246 - chr3:187,451,481 | CDS     | 27         | 92,14               |
| <b>PIM1</b>    | NM_002648    | chr6:37,138,352 - chr6:37,141,867   | CDS     | 16         | 90,98               |

57 \* The amplicon lengths range between 125-175 bp.

58 CDS: coding sequence. Coverage of the panel in total: 94,23%. Amplicons in total: 193.

59 Amplicons pool 1: 98. Amplicons pool 2: 95.

60 **Supplemental table 2.** Custom single amplicons for the NGS targeted sequencing. Primer sequences for targeted resequencing using the Ion  
 61 Amplicon Library Preparation Fusion Method including the sequences of the A or trP1 adapter and the barcode sequence.

| Gene               | Primer name           | Primer sequence (5'-3')                                              |
|--------------------|-----------------------|----------------------------------------------------------------------|
| <b><i>EZH2</i></b> | EZH2 Ex16 646 BC63 AF | CCATCTCATCCCTGCGTGTCTCCGACTCAGCCTTAGAGTTCGATTATTGCTGGCACCATCTGAC     |
|                    | EZH2 Ex16 646 BC63 AR | CCATCTCATCCCTGCGTGTCTCCGACTCAGCCTTAGAGTTCGATTGAATACAGGTTATCAGTGCCTT  |
|                    | EZH2 Ex16 646 trP1F   | CCTCTCTATGGGCAGTCGGTGATTATTGCTGGCACCATCTGAC                          |
|                    | EZH2 Ex16 646 trP1R   | CCTCTCTATGGGCAGTCGGTGATTGAATACAGGTTATCAGTGCCTT                       |
|                    | EZH2 Ex16 646 BC64 AF | CCATCTCATCCCTGCGTGTCTCCGACTCAGCTGAGTTCCGACGATTATTGCTGGCACCATCTGAC    |
|                    | EZH2 Ex16 646 BC64 AR | CCATCTCATCCCTGCGTGTCTCCGACTCAGCTGAGTTCCGACGATTGAATACAGGTTATCAGTGCCTT |
|                    | EZH2 Ex16 646 trP1F   | CCTCTCTATGGGCAGTCGGTGATTATTGCTGGCACCATCTGAC                          |
|                    | EZH2 Ex16 646 trP1R   | CCTCTCTATGGGCAGTCGGTGATTGAATACAGGTTATCAGTGCCTT                       |
|                    | EZH2 Ex16 646 BC65 AF | CCATCTCATCCCTGCGTGTCTCCGACTCAGTCCTGGCACATCGATTATTGCTGGCACCATCTGAC    |
|                    | EZH2 Ex16 646 BC65 AR | CCATCTCATCCCTGCGTGTCTCCGACTCAGTCCTGGCACATCGATTGAATACAGGTTATCAGTGCCTT |
|                    | EZH2 Ex16 646 trP1F   | CCTCTCTATGGGCAGTCGGTGATTATTGCTGGCACCATCTGAC                          |
|                    | EZH2 Ex16 646 trP1R   | CCTCTCTATGGGCAGTCGGTGATTGAATACAGGTTATCAGTGCCTT                       |
| <b><i>IRF4</i></b> | IRF4_ Ex2_ BC91A_ F   | CCATCTCATCCCTGCGTGTCTCCGACTCAGCGGAAGGATGCGATCGGGGCATGAACCTGGAG       |
|                    | IRF4_ Ex2_ BC91A_ R   | CCATCTCATCCCTGCGTGTCTCCGACTCAGCGGAAGGATGCGATCGGTTGTAGTCCTGCTTGC      |
|                    | IRF4_ Ex2_ trP1_ F    | CCTCTCTATGGGCAGTCGGTGATCGGGGCATGAACCTGGAG                            |
|                    | IRF4_ Ex2_ trP1_ R    | CCTCTCTATGGGCAGTCGGTGATCGGTTGTAGTCCTGCTTGC                           |
|                    | IRF4_ A1-35_ BC69A_ F | CCATCTCATCCCTGCGTGTCTCCGACTCAGTTCAATTGGCGATTCTCCCCGCAGTGCAGAG        |
|                    | IRF4_ A1-35_ BC69A_ R | CCATCTCATCCCTGCGTGTCTCCGACTCAGTTCAATTGGCGATTCTCTCCACACCAGC           |
|                    | IRF4_ A1-35_ trP1_ F  | CCTCTCTATGGGCAGTCGGTGATTCTCCCCGCAGTGCAGAG                            |
|                    | IRF4_ A1-35_ trP1_ R  | CCTCTCTATGGGCAGTCGGTGATTCTCTCTCCACACCAGC                             |
|                    | IRF4_ 35-72_ BC69A_ F | CCATCTCATCCCTGCGTGTCTCCGACTCAGTTCAATTGGCGATGAAGCTCCGCCAGTGG          |
|                    | IRF4_ 35-72_ BC69A_ R | CCATCTCATCCCTGCGTGTCTCCGACTCAGTTCAATTGGCGATCTCTGTCTCTGGGCCCTC        |

| Gene          | Primer name                 | Primer sequence (5'-3')                                            |
|---------------|-----------------------------|--------------------------------------------------------------------|
|               | IRF4_35-72_trP1_F           | CCTCTCTATGGGCAGTCGGTGATGAAGCTCCGCCAGTGG                            |
|               | IRF4_35-72_trP1_R           | CCTCTCTATGGGCAGTCGGTGATCTCTGTCTCTGGGCCCTC                          |
| <b>CARD11</b> | CARD11 Ex20 871 BC58 AF     | CCATCTCATCCCTGCGTGTCTCCGACTCAGTCCTAGAACACGATAGGGCCTGACTGATTGATAAAT |
|               | CARD11 Ex20 871 BC58 AR     | CCATCTCATCCCTGCGTGTCTCCGACTCAGTCCTAGAACACGATCTGAAGGAGCTGGCCAAAA    |
|               | CARD11 Ex20 871 trP1F       | CCTCTCTATGGGCAGTCGGTGATAGGGCCTGACTGATTGATAAAT                      |
|               | CARD11 Ex20 871 trP1R       | CCTCTCTATGGGCAGTCGGTGATCTGAAGGAGCTGGCCAAAA                         |
|               | CARD11 Ex23/24 1046 BC60 AF | CCATCTCATCCCTGCGTGTCTCCGACTCAGTCTAGCTCTTCGATCTCAGAAGGCAGAAGACGGA   |
|               | CARD11 Ex23/24 1046 BC60 AR | CCATCTCATCCCTGCGTGTCTCCGACTCAGTCTAGCTCTTCGATCATCCAACCTCCCAGTCCC    |
|               | CARD11 Ex23/24 1046 trP1F   | CCTCTCTATGGGCAGTCGGTGATCTCAGAAGGCAGAAGACGGA                        |
|               | CARD11 Ex23/24 1046 trP1R   | CCTCTCTATGGGCAGTCGGTGATCATCCAACCTCCCAGTCCC                         |
|               | CARD11_Ex5_BC33A_F          | CCATCTCATCCCTGCGTGTCTCCGACTCAGTTCTCATTGAACGATTGGAGCTGCTAACCTTCCAG  |
|               | CARD11_Ex5_BC33A_R          | CCATCTCATCCCTGCGTGTCTCCGACTCAGTTCTCATTGAACGATGTCTCGGCTCCTCATGACC   |
|               | CARD11_Ex5_trP1_F           | CCTCTCTATGGGCAGTCGGTGATTGGAGCTGCTAACCTTCCAG                        |
|               | CARD11_Ex5_trP1_R           | CCTCTCTATGGGCAGTCGGTGATGTCTCGGCTCCTCATGACC                         |
| <b>PIM1</b>   | PIM1_Ex4_124_BC71_F         | CCATCTCATCCCTGCGTGTCTCCGACTCAGTGAGGCTCCGACGATAAGAAGGTGAGCTCGGGTTT  |
|               | PIM1_Ex4_124_BC71_R         | CCATCTCATCCCTGCGTGTCTCCGACTCAGTGAGGCTCCGACGATTTTTTCGTCTTGATGTGCGG  |
|               | PIM1_Ex4_124_trP1_F         | CCTCTCTATGGGCAGTCGGTGATAAGAAGGTGAGCTCGGGTTT                        |
|               | PIM1_Ex4_124_trP1_R         | CCTCTCTATGGGCAGTCGGTGATTTTTTCGTCTTGATGTGCGG                        |
| <b>BCL2</b>   | BCL2_Ex2_192_BC71_F         | CCATCTCATCCCTGCGTGTCTCCGACTCAGTGAGGCTCCGACGATGCCTTCTTTGAGTTCGGTGG  |
|               | BCL2_Ex2_192_BC71_R         | CCATCTCATCCCTGCGTGTCTCCGACTCAGTGAGGCTCCGACGATACCAAGTGCACCTACCCA    |
|               | BCL2_Ex2_192_trP1_F         | CCTCTCTATGGGCAGTCGGTGATGCCTTCTTTGAGTTCGGTGG                        |
|               | BCL2_Ex2_192_trP1_R         | CCTCTCTATGGGCAGTCGGTGATACCAAGTGCACCTACCCA                          |

63 **Supplemental table 3.** Overview of the NGS analyses performed.

| Case | Panel Analysis              | Single Amplicons                                    |
|------|-----------------------------|-----------------------------------------------------|
| 1    | AmpliSeq Custom DLBCL Panel | EZH2 Ex16 646<br>IRF4 Ex2 35-72                     |
| 2    | AmpliSeq Custom DLBCL Panel | CARD11 Ex20 871<br>EZH2 Ex16 646<br>IRF4 Ex2 35-72  |
| 5    | AmpliSeq Custom DLBCL Panel | EZH2 Ex16 646<br>IRF4 Ex2 35-72                     |
| 6    | AmpliSeq Custom DLBCL Panel | IRF4 Ex2 35-72<br>EZH2 Ex16 646                     |
| 7    | AmpliSeq Custom DLBCL Panel | IRF4 Ex2 35-72                                      |
| 8    | AmpliSeq Custom DLBCL Panel | IRF4 Ex2 35-72                                      |
| 9    | AmpliSeq Custom DLBCL Panel | CARD11 Ex5 215<br>IRF4 Ex2 35-72                    |
| 10   | AmpliSeq Custom DLBCL Panel | IRF4 Ex2 35-72                                      |
| 11   | AmpliSeq Custom DLBCL Panel | CARD11 Ex23 1046<br>IRF4 Ex2 35-72                  |
| 13   | AmpliSeq Custom DLBCL Panel | CARD11 Ex23 1046<br>IRF4 Ex2 1-35<br>IRF4 Ex2 35-72 |
| 15   | AmpliSeq Custom DLBCL Panel | CARD11 Ex23 1046<br>EZH2 Ex16 646<br>IRF4 Ex2 35-72 |
| 16   | AmpliSeq Custom DLBCL Panel | CARD11 Ex23 1046<br>IRF4 Ex2 35-72                  |
| 17   | AmpliSeq Custom DLBCL Panel | CARD11 Ex23 1046<br>IRF4 Ex2 35-72                  |
| 19   | AmpliSeq Custom DLBCL Panel | EZH2 Ex16 646<br>IRF4 Ex2 35-72                     |
| 20   | AmpliSeq Custom DLBCL Panel | BCL2 Ex2 53<br>IRF4 Ex2 35-72<br>EZH2 Ex16 646      |
| 21   | AmpliSeq Custom DLBCL Panel | IRF4 Ex2 35-72                                      |



| <b>Case</b> | <b>Panel Analysis</b>       | <b>Single Amplicons</b>                         |
|-------------|-----------------------------|-------------------------------------------------|
|             |                             | EZH2 Ex16 646                                   |
| <b>22</b>   | AmpliSeq Custom DLBCL Panel | IRF4 Ex2 35-72                                  |
| <b>23</b>   | AmpliSeq Custom DLBCL Panel | IRF4 Ex2 35-72                                  |
| <b>24</b>   | AmpliSeq Custom DLBCL Panel | IRF4 Ex2 35-72                                  |
| <b>25</b>   | AmpliSeq Custom DLBCL Panel | EZH2 Ex16 646<br>IRF4 Ex2 35-72                 |
| <b>26</b>   | AmpliSeq Custom DLBCL Panel | IRF4 Ex2 35-72<br>BCL2 Ex2 192                  |
| <b>27</b>   | AmpliSeq Custom DLBCL Panel | IRF4 Ex2 35-72                                  |
| <b>29</b>   | AmpliSeq Custom DLBCL Panel | EZH2 Ex16 646<br>IRF4 Ex2 35-72                 |
| <b>30</b>   | AmpliSeq Custom DLBCL Panel | IRF4 Ex2 35-72                                  |
| <b>31</b>   | AmpliSeq Custom DLBCL Panel | IRF4 Ex2 35-72                                  |
| <b>32</b>   | AmpliSeq Custom DLBCL Panel | EZH2 Ex16 646<br>IRF4 Ex2 35-72                 |
| <b>33</b>   | AmpliSeq Custom DLBCL Panel | EZH2 Ex16 646<br>IRF4 Ex2 35-72<br>PIM1 Ex4 124 |
| <b>34</b>   | AmpliSeq Custom DLBCL Panel | IRF4 Ex2 35-72                                  |
| <b>35</b>   | AmpliSeq Custom DLBCL Panel | IRF4 Ex2 1-35<br>IRF4 Ex2 35-72                 |
| <b>36</b>   | AmpliSeq Custom DLBCL Panel | IRF4 Ex2 1-35<br>IRF4 Ex2 35-72                 |

65 **Supplemental table 4.** List of all mutations detected.

| #  | VAF Thres hold | Gene           | Transcript   | Coordinates                     | VAF | Coverage | cDNA change  | Protein change | Prediction              |                        |       |
|----|----------------|----------------|--------------|---------------------------------|-----|----------|--------------|----------------|-------------------------|------------------------|-------|
|    |                |                |              |                                 |     |          |              |                | COSMIC FATHMM           | Varsome                | CADD  |
| 2  | 5%             | <i>CD79B</i>   | NM_001039933 | chr17:62006798                  | 29% | 2076     | c.590A>C     | p.Y197S        | Pathogenic (score 0.94) | Likely pathogenic      | 24.5  |
| 5  | 5%             | <i>TNFAIP3</i> | NM_001270507 | chr6:138198338                  | 10% | 10385    | c.931G>T     | p.E311*        | –                       | Pathogenic             | 38    |
| 8  | 5%             | <i>BCL2</i>    | NM_000633    | chr18:60985692                  | 45% | 2488     | c.208T>G     | p.S70A         | –                       | Uncertain significance | 17.07 |
|    |                | <i>EZH2</i>    | NM_004456    | chr7:148508728                  | 14% | 190      | c.1936T>A    | p.Y646N        | Pathogenic (score 0.99) | Likely pathogenic      | 32    |
| 9  | 5%             | <i>PIM1</i>    | NM_002648    | chr6:37139097                   | 19% | 33595    | c.437G>A     | p.S146N        | Pathogenic (score 0.78) | Uncertain significance | 21.9  |
|    |                | <i>CARD11</i>  | NM_032415    | chr7:2983885                    | 10% | 5299     | c.645G>C     | p.K215N        | –                       | Uncertain significance | 22    |
| 10 | 5%             | <i>MYD88</i>   | NM_002468    | chr3:38182292                   | 50% | 18078    | c.728G>A     | p.S243N        | –                       | Pathogenic             | 28.7  |
|    |                | <i>PIM1</i>    | NM_002648    | chr6:37138354                   | 14% | 3582     | c.3G>A       | p.M1I          | –                       | Pathogenic             | 24.1  |
|    |                | <i>PIM1</i>    | NM_002648    | chr6:37138423                   | 13% | 3699     | c.72G>C      | p.K24N         | –                       | Uncertain significance | 18.57 |
| 11 | 5%             | <i>PRDM1</i>   | NM_001198    | chr6:106536223 - chr6:106536233 | 50% | 34216    | c.190_200dup | p.D68Tfs       | –                       | Pathogenic             | N/A   |
| 13 | 5%             | <i>PRDM1</i>   | NM_001198    | chr6:106547183                  | 51% | 7353     | c.420delC    | p.R141Efs      | –                       | Pathogenic             | 31    |
|    |                | <i>IRF4</i>    | NM_002460    | chr6:393187                     | 23% | 1217     | c.35T>G      | p.F12C         | –                       | Uncertain significance | 23.3  |

| #         | VAF Thres hold | Gene         | Transcript   | Coordinates                   | VAF   | Coverage | cDNA change  | Protein change | Prediction              |                        |       |
|-----------|----------------|--------------|--------------|-------------------------------|-------|----------|--------------|----------------|-------------------------|------------------------|-------|
|           |                |              |              |                               |       |          |              |                | COSMIC FATHMM           | Varsome                | CADD  |
|           |                | <i>IRF4</i>  | NM_002460    | chr6:393190                   | 23%   | 1218     | c.38G>C      | p.G13A         | –                       | Uncertain significance | 25    |
|           |                | <i>IRF4</i>  | NM_002460    | chr6:393208                   | 22%   | 3827     | c.56G>T      | p.C19F         | –                       | Uncertain significance | 28.9  |
|           |                | <i>IRF4</i>  | NM_002460    | chr6:393252                   | 28% † | 61399    | c.100A>G     | p.S34G         | –                       | Uncertain significance | 27    |
|           |                | <i>IRF4</i>  | NM_002460    | chr6:393260                   | 42% † | 61720    | c.108G>T     | p.K36N         | Pathogenic (score 0.91) | Uncertain significance | 24.8  |
|           |                | <i>IRF4</i>  | NM_002460    | chr6:393295                   | 26% † | 64929    | c.143G>A     | p.S48N         | –                       | Uncertain significance | 25    |
|           |                | <i>IRF4</i>  | NM_002460    | chr6:393332                   | 38% † | 65135    | c.180G>C     | p.Q60H         | Pathogenic (score 0.87) | Uncertain significance | 24.9  |
|           |                | <i>IRF4</i>  | NM_002460    | chr6:393342                   | 41% † | 65920    | c.190C>T     | p.R64C         | –                       | Uncertain significance | 32    |
| <b>15</b> | 5%             | <i>PIM1</i>  | NM_002648    | chr6:37139062 - chr6:37139070 | 89%   | 4100     | c.402_410del | p.E135_G137del | –                       | Uncertain significance | N/A   |
|           |                | <i>CD79B</i> | NM_001039933 | chr17:62006798                | 42%   | 4652     | c.590A>T     | p.Y197F        | Pathogenic (score 0.94) | Uncertain significance | 24    |
|           |                | <i>BCL2</i>  | NM_000633    | chr18:60985889                | 14%   | 4434     | c.11C>T      | p.A4V          | Pathogenic (score 0.92) | Uncertain significance | 22.7  |
| <b>17</b> | 5%             | <i>BCL2</i>  | NM_000633    | chr18:60985743                | 89%   | 2300     | c.157C>T     | p.P53S         | Neutral (score 0.04)    | Uncertain significance | 11.12 |
|           |                | <i>BCL2</i>  | NM_000633    | chr18:60985594                | 58%   | 5600     | c.306C>A     | p.D102E        | Neutral (score 0.01)    | Uncertain significance | 21.2  |

| #         | VAF Thres hold | Gene          | Transcript | Coordinates                   | VAF | Coverage | cDNA change        | Protein change | Prediction              |                        |      |
|-----------|----------------|---------------|------------|-------------------------------|-----|----------|--------------------|----------------|-------------------------|------------------------|------|
|           |                |               |            |                               |     |          |                    |                | COSMIC FATHMM           | Varsome                | CADD |
|           |                | <i>BCL2</i>   | NM_000633  | chr18:60985590                | 58% | 5600     | c.310T>A           | p.F104I        | –                       | Uncertain significance | 22.2 |
|           |                | <i>CARD11</i> | NM_032415  | chr7:2977614                  | 51% | 11300    | c.1070A>T          | p.D357V        | Pathogenic (score 0.94) | Uncertain significance | 28.2 |
|           |                | <i>CARD11</i> | NM_032415  | chr7:2979453                  | 46% | 3970     | c.794A>C           | p.Q265P        | –                       | Uncertain significance | 21.6 |
|           |                | <i>BCL2</i>   | NM_000633  | chr18:60985890                | 45% | 2300     | c.10G>C            | p.A4P          | Neutral (score 0.44)    | Uncertain significance | 22.2 |
|           |                | <i>BCL2</i>   | NM_000633  | chr18:60985886                | 45% | 2300     | c.14G>A            | p.G5E          | –                       | Uncertain significance | 25.3 |
|           |                | <i>PIM1</i>   | NM_002648  | chr6:37139210                 | 36% | 13990    | c.550C>G           | p.L184V        | Pathogenic (score 0.94) | Uncertain significance | 27.3 |
| <b>19</b> | 5%             | <i>MYD88</i>  | NM_002468  | chr3:38182641                 | 84% | 5946     | c.794T>C           | p.L265P        | Pathogenic (score 0.96) | Pathogenic             | 32   |
|           |                | <i>PRDM1</i>  | NM_001198  | chr6:106534471                | 61% | 837      | c.42+1G>C          | p.?            | –                       | Pathogenic             | 35   |
|           |                | <i>PRDM1</i>  | NM_001198  | chr6:106554273                | 59% | 2282     | c.1801C>T          | p.R601W        | –                       | Uncertain significance | 32   |
|           |                | <i>PIM1</i>   | NM_002648  | chr6:37138802 - chr6:37138804 | 38% | 3128     | c.235_237delinsAAA | p.E79K         | Pathogenic (score 0.97) | Uncertain significance | 23.4 |
| <b>20</b> | 7%             | <i>MYD88</i>  | NM_002468  | chr3:38182641                 | 52% | 9706     | c.794T>C           | p.L265P        | Pathogenic (score 0.96) | Pathogenic             | 32   |
| <b>21</b> | 5%             | <i>BCL2</i>   | NM_000633  | chr18:60985840                | 33% | 5426     | c.60T>G            | p.H20Q         | N/A                     | Uncertain significance | 21.9 |

| #         | VAF Thres hold | Gene          | Transcript | Coordinates    | VAF | Coverage | cDNA change | Protein change | Prediction              |                        |       |
|-----------|----------------|---------------|------------|----------------|-----|----------|-------------|----------------|-------------------------|------------------------|-------|
|           |                |               |            |                |     |          |             |                | COSMIC FATHMM           | Varsome                | CADD  |
|           |                | <i>CARD11</i> | NM_032415  | chr7:2977614   | 30% | 8364     | c.1070A>T   | p.D357V        | Pathogenic (score 0.94) | Uncertain significance | 29.8  |
|           |                | <i>BCL6</i>   | NM_001706  | chr3:187444538 | 30% | 10326    | c.1689C>G   | p.S563R        | –                       | Uncertain significance | 28.8  |
| <b>23</b> | 5%             | <i>MYD88</i>  | NM_002468  | chr3:38182032  | 28% | 11828    | c.656C>G    | p.S219C        | Pathogenic (score 0.96) | Uncertain significance | 29.1  |
| <b>24</b> | 5%             | <i>PIM1</i>   | NM_002648  | chr6:37138769  | 35% | 1057     | c.202C>T    | p.H68Y         | Pathogenic (score 0,97) | Uncertain significance | 22.4  |
|           |                | <i>BCL2</i>   | NM_000633  | chr18:60985549 | 7%  | 2238     | c.351C>G    | p.S117R        | Neutral (score 0,03)    | Uncertain significance | 14.26 |
|           |                | <i>BCL2</i>   | NM_000633  | chr18:60985562 | 8%  | 2211     | c.338C>T    | p.A113V        | Neutral (score 0,03)    | Uncertain significance | 14.07 |
|           |                | <i>BCL2</i>   | NM_000633  | chr18:60985575 | 8%  | 2216     | c.325C>G    | p.R109G        | –                       | Uncertain significance | 24.7  |
|           |                | <i>BCL2</i>   | NM_000633  | chr18:60985635 | 32% | 658      | c.265G>A    | p.V89M         | –                       | Uncertain significance | 22.4  |
|           |                | <i>BCL2</i>   | NM_000633  | chr18:60985644 | 32% | 644      | c.256C>G    | p.L86V         | Neutral (score 0,24)    | Uncertain significance | 17.47 |
| <b>25</b> | 5%             | <i>CARD11</i> | NM_032415  | chr7:2958135   | 55% | 347      | c.2597G>A   | p.R866Q        | Neutral (score 0.22)    | Uncertain significance | 12.47 |
| <b>26</b> | 6%             | <i>PIM1</i>   | NM_002648  | chr6:37138365  | 35% | 1027     | c.14A>G     | p.K5R          | –                       | Uncertain significance | 24.1  |
|           |                | <i>PIM1</i>   | NM_002648  | chr6:37138367  | 35% | 1027     | c.16A>G     | p.I6V          | –                       | Uncertain significance | 18.74 |

| #         | VAF Thres hold | Gene         | Transcript   | Coordinates    | VAF   | Coverage | cDNA change | Protein change | Prediction              |                        |       |
|-----------|----------------|--------------|--------------|----------------|-------|----------|-------------|----------------|-------------------------|------------------------|-------|
|           |                |              |              |                |       |          |             |                | COSMIC FATHMM           | Varsome                | CADD  |
|           |                | <i>PIM1</i>  | NM_002648    | chr6:37138901  | 30%   | 2088     | c.241C>T    | p.P81S         | Pathogenic (score 0,97) | Uncertain significance | 22.8  |
|           |                | <i>EZH2</i>  | NM_004456    | chr7:148508727 | 30% † | 5985     | c.1937A>G   | p.Y646C        | Pathogenic (score 0,99) | Likely pathogenic      | 25.2  |
|           |                | <i>BCL2</i>  | NM_000633    | chr18:60985644 | 34%   | 1002     | c.256C>T    | p.L86F         | Neutral (score 0,29)    | Uncertain significance | 19.64 |
|           |                | <i>BCL2</i>  | NM_000633    | chr18:60985326 | 9% †  | 256782   | c.574A>C    | p.N192H        | Neutral (0,10)          | Uncertain significance | 28,2  |
| <b>27</b> | 5%             | <i>BCL2</i>  | NM_000633    | chr18:60795869 | 30%   | 9448     | c.709G>A    | p.G237S        | –                       | Uncertain significance | 24.5  |
|           |                | <i>BCL2</i>  | NM_000633    | chr18:60985840 | 24%   | 4187     | c.60T>A     | p.H20Q         | N/A                     | Uncertain significance | 21.9  |
| <b>31</b> | 5%             | <i>CD79B</i> | NM_001039933 | chr17:62006793 | 62%   | 9807     | c.594+1G>C  | p.?            | –                       | Pathogenic             | 32    |
| <b>33</b> | 5%             | <i>PIM1</i>  | NM_002648    | chr6:37139078  | 13% † | 152732   | c.418C>T    | p.Q140*        | N/A                     | Pathogenic             | 37    |
|           |                | <i>PIM1</i>  | NM_002648    | chr6:37139063  | 11% † | 152732   | c.403G>T    | p.E135*        | –                       | Pathogenic             | 37    |
| <b>35</b> | 5%             | <i>IRF4</i>  | NM_002460    | chr6:393172    | 31%   | 903      | c.20G>T     | p.G7V          | –                       | Uncertain significance | 22    |
|           |                | <i>IRF4</i>  | NM_002460    | chr6:393201    | 11%   | 911      | c.49G>C     | p.V17L         | –                       | Uncertain significance | 22.6  |
|           |                | <i>IRF4</i>  | NM_002460    | chr6:393206    | 11%   | 906      | c.54C>A     | p.S18R         | –                       | Uncertain significance | 22.6  |
|           |                | <i>IRF4</i>  | NM_002460    | chr6:393262    | 21% † | 2285     | c.110A>T    | p.Y37F         | –                       | Uncertain significance | 28.4  |

| # | VAF Thres hold | Gene        | Transcript | Coordinates               | VAF   | Coverage | cDNA change        | Protein change | Prediction    |                        |      |
|---|----------------|-------------|------------|---------------------------|-------|----------|--------------------|----------------|---------------|------------------------|------|
|   |                |             |            |                           |       |          |                    |                | COSMIC FATHMM | Varsome                | CADD |
|   |                | <i>IRF4</i> | NM_002460  | chr6:393283               | 21% † | 2444     | c.131A>G           | p.N44S         | –             | Uncertain significance | 27   |
|   |                | <i>IRF4</i> | NM_002460  | chr6:393295               | 16% † | 2310     | c.143G>C           | p.S48T         | –             | Uncertain significance | 21.1 |
|   |                | <i>IRF4</i> | NM_002460  | chr6:393298               | 23% † | 2496     | c.146T>C           | p.I49T         | –             | Uncertain significance | 25.4 |
|   |                | <i>IRF4</i> | NM_002460  | chr6:393330 - chr6:393332 | 23% † | 2575     | c.178_180delinsTTC | p.Q60F         | –             | Uncertain significance | N/A  |

66

67 † Covered only in the single amplicon, frequency therefore of the single amplicon.

68 ‡ Covered in both single amplicon and panel, frequency of single amplicon.

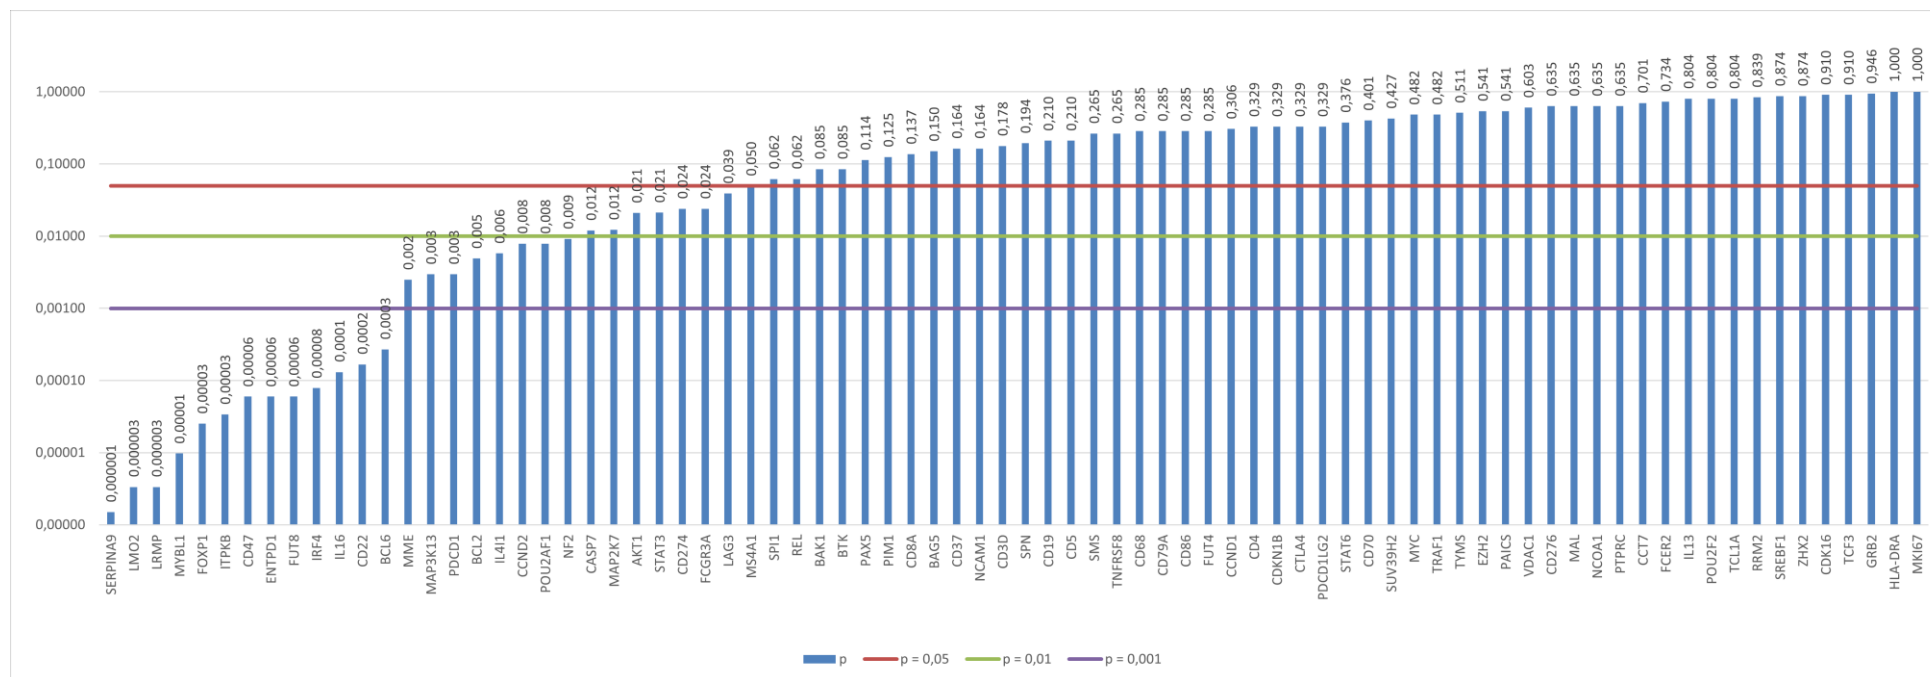

71

72 **Supplemental Fig. 1: p values of Mann Whitney U test of the distribution of gene expression levels across the GEP subtype (GCB – ABC)**  
 73 **(log<sub>10</sub> y-Axis).** Each bar on the x-axis represents the p-value of one statistical test. The red, green, and purple horizontal lines represent the significance  
 74 levels of  $p = .05$ ,  $p = .005$  and  $p = .001$ . At the significance level  $p \leq 0.001$ , a total of 13 of the genes examined resp. the corresponding mRNAs showed  
 75 significant differences in gene expression between the subgroups. For the significance level  $p \leq 0.01$ , this was the case for a total of 21 of the genes  
 76 resp. mRNAs examined (including the 13 genes resp. mRNAs significant at  $p \leq 0.001$ ), for  $p \leq 0.05$  for a total of 29 genes resp. mRNAs.

77 (Supplemental Figure 1 was created using Microsoft Excel version 2210.)



## 78 Supplemental references

- 79 1. Ahmed S, Glover P, Taylor J, Sha C, Care MA, Tooze R, Davies A, Westhead DR,  
80 Johnson PWM, Burton C, Barrans SL (2021) Comparative analysis of gene expression  
81 platforms for cell-of-origin classification of diffuse large B-cell lymphoma shows high  
82 concordance *British Journal of Haematology* 192:599-604. doi: 10.1111/bjh.17246
- 83 2. Nann D, Ramis-Zaldivar JE, Müller I, Gonzalez-Farre B, Schmidt J, Egan C, Salmeron-  
84 Villalobos J, Clot G, Mattern S, Otto F, Mankel B, Colomer D, Balagué O, Szablewski  
85 V, Lome-Maldonado C, Leoncini L, Dojcinov S, Chott A, Copie-Bergman C, Bonzheim  
86 I, Fend F, Jaffe ES, Campo E, Salaverria I, Quintanilla-Martinez L (2020) Follicular  
87 lymphoma t(14;18)-negative is genetically a heterogeneous disease *Blood Advances*  
88 4:5652-5665. doi: 10.1182/bloodadvances.2020002944
- 89 3. Frauenfeld L, Castrejon-de-Anta N, Ramis-Zaldivar JE, Streich S, Salmerón-Villalobos  
90 J, Otto F, Mayer AK, Steinhilber J, Pinyol M, Mankel B, Ramsower C, Bonzheim I, Fend  
91 F, Rimsza LM, Salaverria I, Campo E, Balagué O, Quintanilla-Martinez L (2022) Diffuse  
92 large B-cell lymphomas in adults with aberrant coexpression of CD10, BCL6, and  
93 MUM1 are enriched in IRF4 rearrangements *Blood Advances* 6:2361-2372. doi:  
94 10.1182/bloodadvances.2021006034

95
